# Supplementary material for: In situ prepared “polymer-in-salt” electrolytes enabling high-voltage lithium metal batteries
Source: Royal Society of Chemistry journal article supplement (doi:10.1039/d2ta00093h), 2022-01-01
Supplement: d2ta00093h1.pdf [file d2ta00093h1.pdf]

## *Supporting Information*

### ***In-situ* prepared “polymer-in-salt” electrolytes enabling high-voltage lithium metal battery**

Mengjun Sun <sup>a,b</sup>, Ziqi Zeng <sup>a,\*</sup>, Wei Zhong <sup>a,b</sup>, Zhilong Han <sup>a,c</sup>, Linfeng Peng <sup>a,c</sup>, Chuang Yu <sup>a</sup>, Shijie Cheng <sup>a</sup>, Jia Xie <sup>a,\*</sup>

<sup>a</sup> *State Key Laboratory of Advanced Electromagnetic Engineering and Technology, School of Electrical and Electronic Engineering, Huazhong University of Science and Technology, Wuhan 430074, China*

<sup>b</sup> *State Key Laboratory of Materials Processing and Die & Mould Technology, School of Materials Science and Engineering, Huazhong University of Science and Technology, Wuhan 430074, China*

<sup>c</sup> *School of Physics, Huazhong University of Science and Technology, Wuhan 430074, China*

\* Corresponding authors.

*E-mail address:* xiejia@hust.edu.cn (J. Xie), ziqizeng@hust.edu.cn (Z. Zeng).

## 2.1 Materials

$\epsilon$ -Caprolactone ( $\epsilon$ -CL, 99%), DL-Lactide (LA, 98%), stannous octoate ( $\text{Sn}(\text{Oct})_2$ , 95%) and were purchased from Aladdin. Lithium bis(trifluoromethanesulphonyl)imide ( $\text{LiTFSI}$ , 99%) and lithium difluoro oxalate borate ( $\text{LiDFOB}$ ) were purchased from Capchem and Do-Fluoride New Materials Co., Ltd.. A number of activated molecular sieve were used to remove the trace amounts of water of  $\epsilon$ -CL and  $\text{Sn}(\text{Oct})_2$ . Polyethylene separator about 8  $\mu\text{m}$  was provided by Changzhou Senior New Energy Materials Co., Ltd. and the detailed information of the separator are shown in Table S4.

## 2.3 Materials characterization

A Fourier-transform infrared spectra FTIR test was conducted on a Bruker Vertex 70 spectrometer (the frequency range is 400 – 4000  $\text{cm}^{-1}$ ). The  $^1\text{H}$  nuclear magnetic resonance (NMR) spectrum were obtained using a Bruker 400 MHz spectrometer. CL, LA and the obtained PEs were dissolved in  $\text{CDCl}_3$  for  $^1\text{H}$  NMR testing. All samples were prepared in glove box. The morphologies of Li foil were investigated by a scanning electron microscope (SEM, Nova NanoSEM 450, FEI). X-ray photoelectron spectroscopy (XPS) was performed using an AXIS-ULTRA DLD-600W (Shimadzu-Kratos Co., Ltd.). Alternating-current impedances (AC) impedances, cyclic voltammetry (CV) and linear sweep voltammetry (LSV) tests are implemented by CHI660E electrochemical workstation (*Chenhua, Shanghai, China*).

## Supplementary Figures:

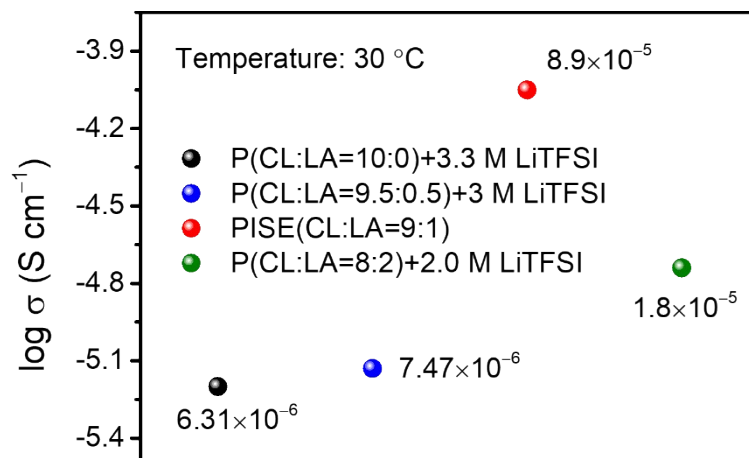

**Fig. S1** The ionic conductivity of PCL-based electrolytes with different mass ratio of CL and LA.

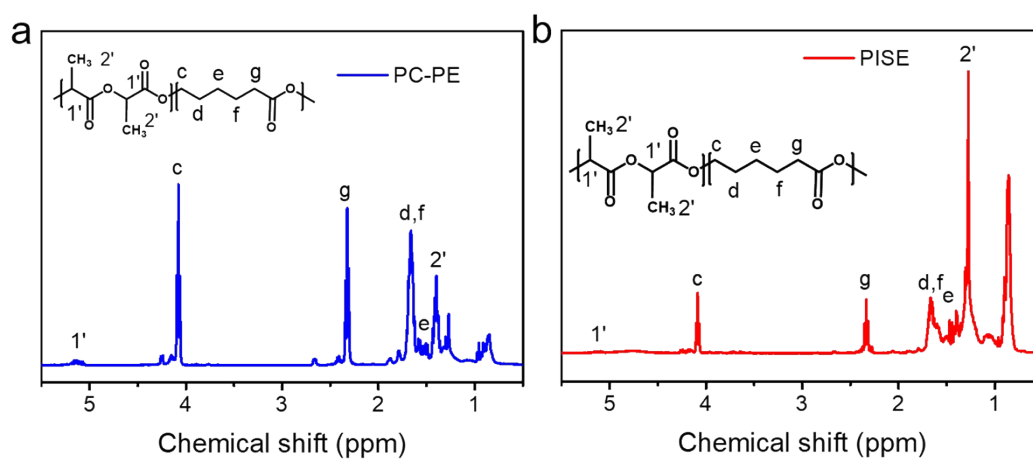

**Fig. S2** Characterization of the *in-situ* PISE.  $^1\text{H}$  NMR spectra of (a) PCA-PE and (b) PISE.

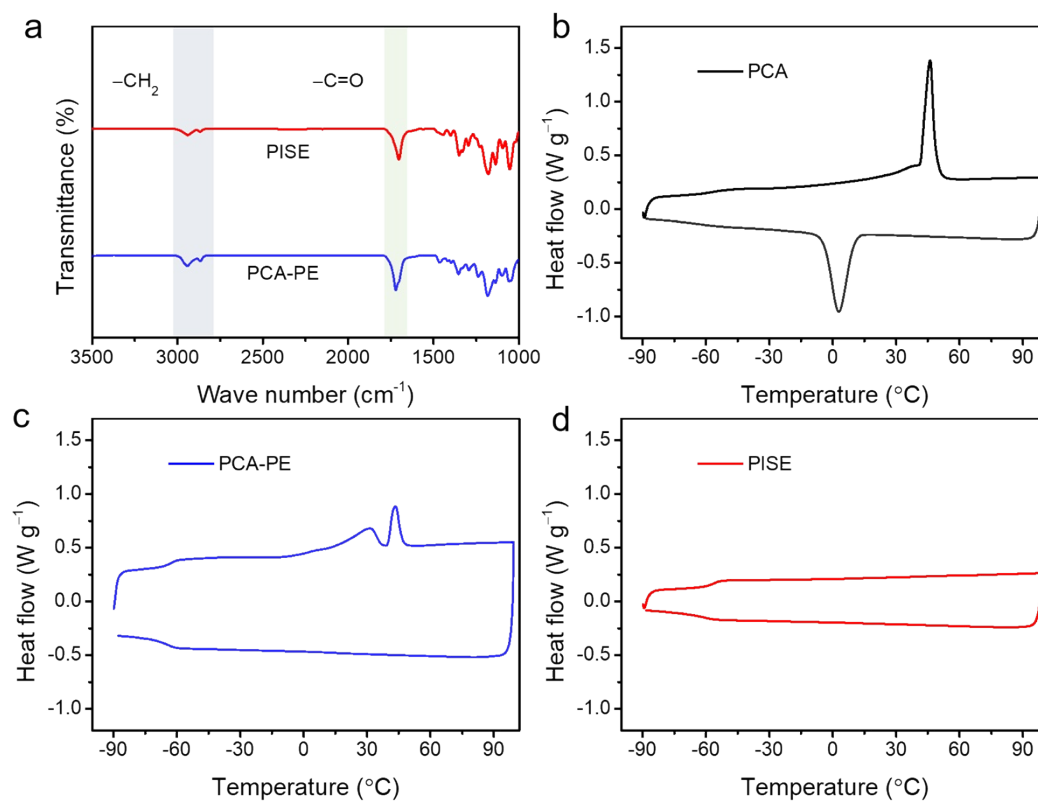

**Fig. S3** (a) FTIR spectrum comparison of PCA-PE and PISE. (b-d) DSC profiles of PCA and PEs.

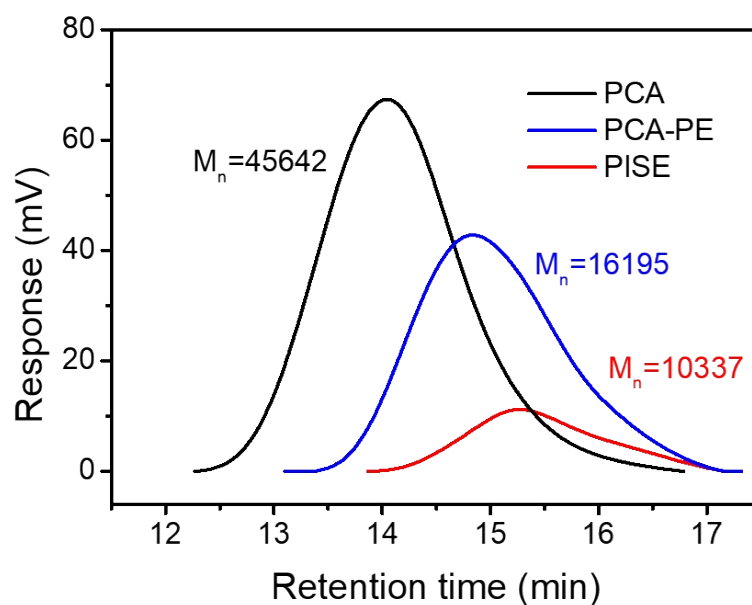

**Fig. S4** Gel permeation chromatography (GPC) of PCA, PCA-PE and PISE.

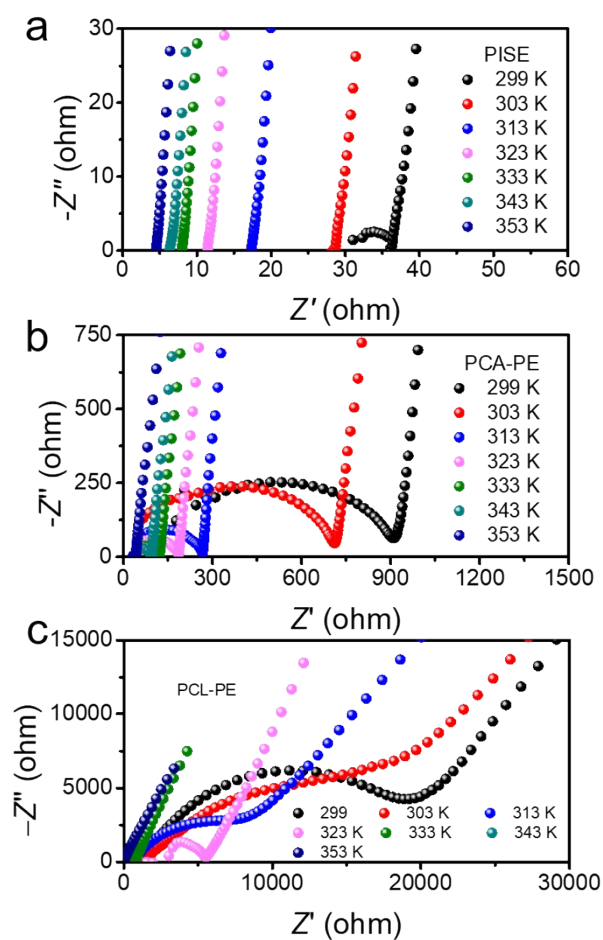

**Fig. S5** Electrochemical characteristics of *in-situ* PCLA-based electrolytes. EIS curves of (a) SS/*in-situ* PCLA-PE1/SS, (b) SS/*in-situ* PISE/SS symmetric cell at different temperature.

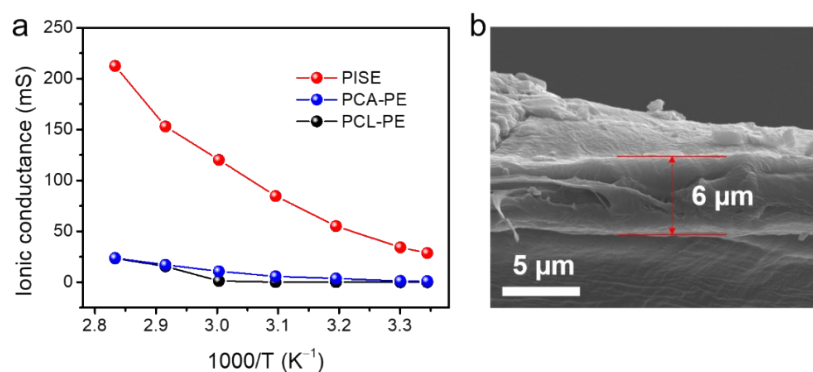

**Fig. S6** (a) The temperature-dependent ionic conductance of PISE. (b) Cross-section SEM images of the PE separator after *in-situ* polymerization of  $\epsilon$ -CL and LA.

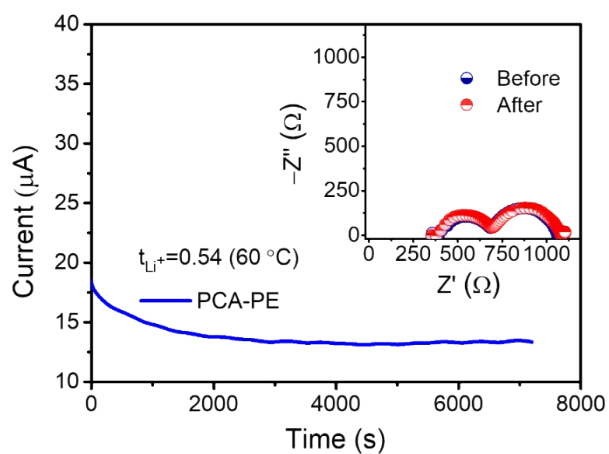

**Fig. S7** Chronoamperometry profile under a potential of 10 mV and the EIS spectra before and after the polarization test.

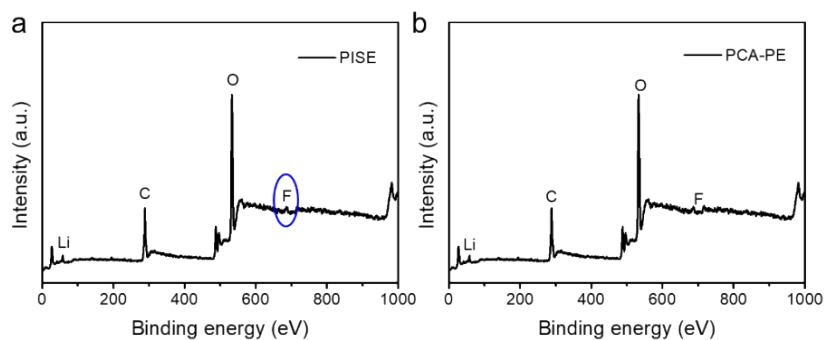

**Fig. S8** XPS spectra of lithium surface of the cycled Li/Li symmetrical battery with *in-situ* (a) PISE and (b) PCA-PE.

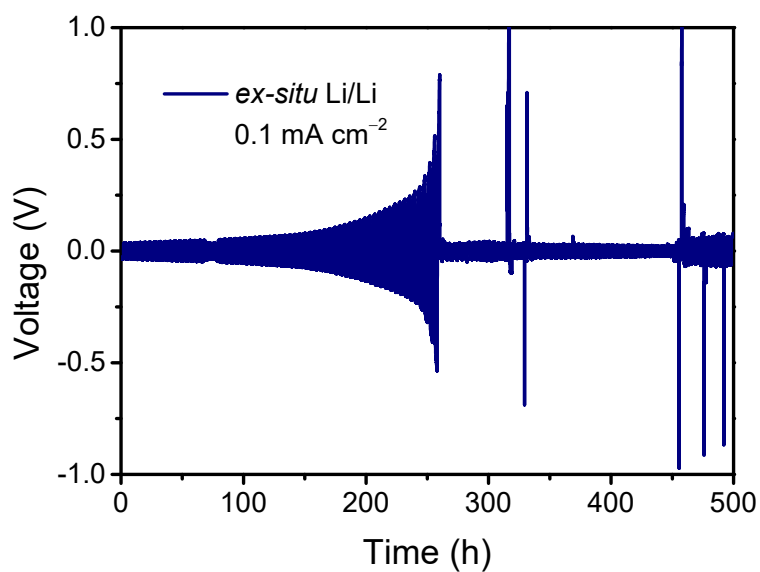

**Fig. S9** Cycling stability of *ex-situ* Li/Li symmetrical cells based on PISE at 30 °C.

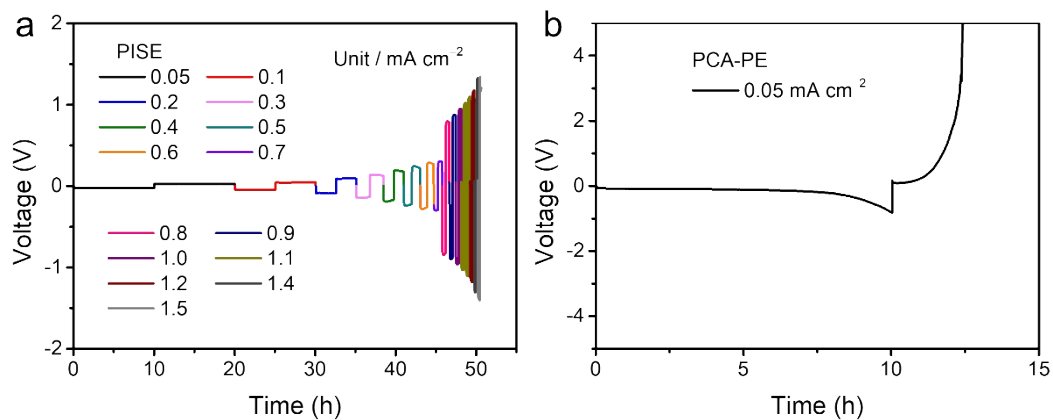

**Fig. S10** Li plating/stripping overpotential profiles in the (a) Li/PISE/Li cell and (b) Li/PCA-PE/Li cell at step-increased current densities.

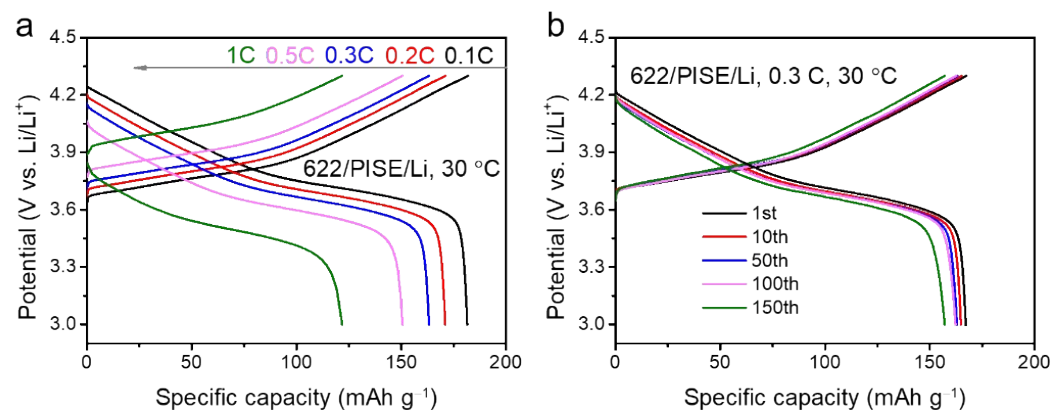

**Fig. S11** (a) Charge/discharge profiles for *in-situ* NCM622/PISE/Li cells at different current density. (b) Galvanostatic charge/discharge profiles for *in-situ* NCM622/PISE/Li cells at 0.3 C.

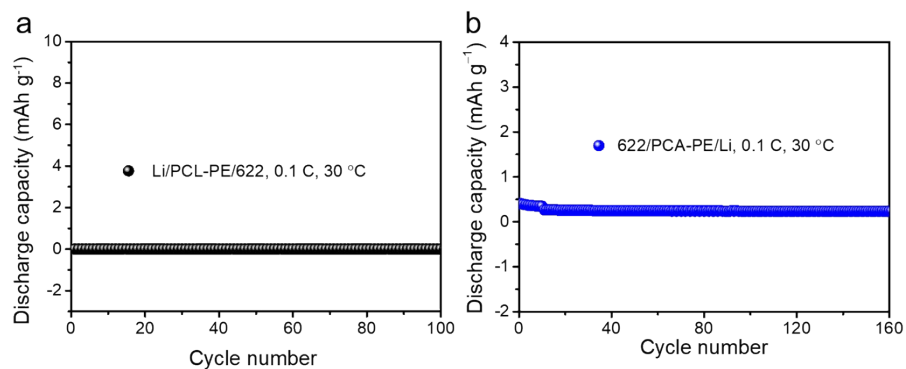

**Fig. S12** Cycling performances of the NCM622/Li cells based on PCA-PE with the voltage range of 3.0–4.3 V.

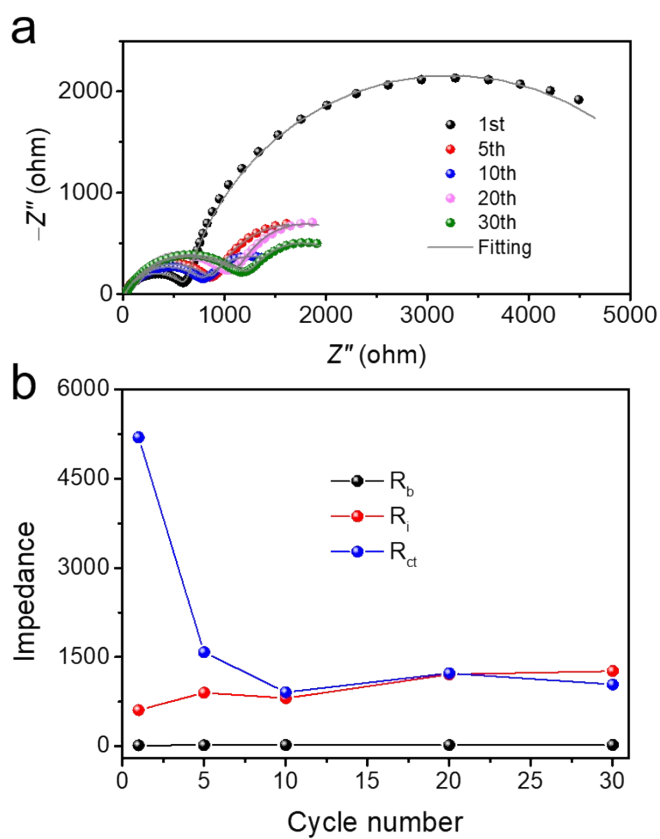

**Fig. S13** Resistances of NCM811/*in-situ* PISE/Li cell after cycling at 30 °C.

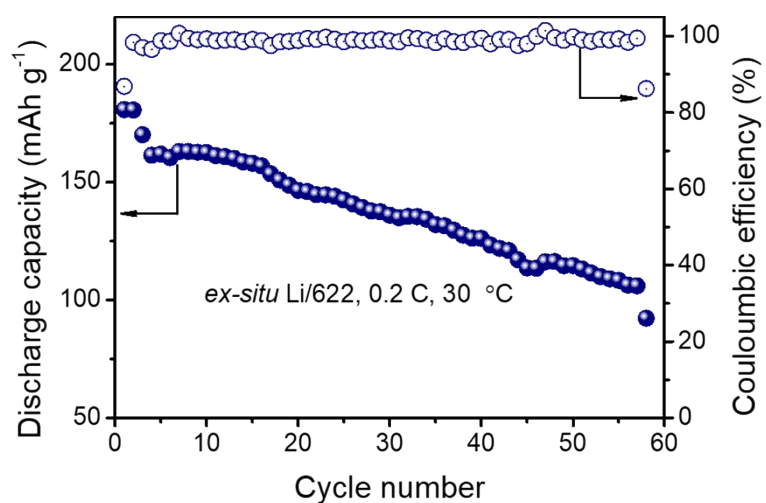

**Fig. S14** Cycling performances of the NCM622/*ex-situ* PISE/Li cells at 0.2 C in the voltage range of 3.0–4.3 V.

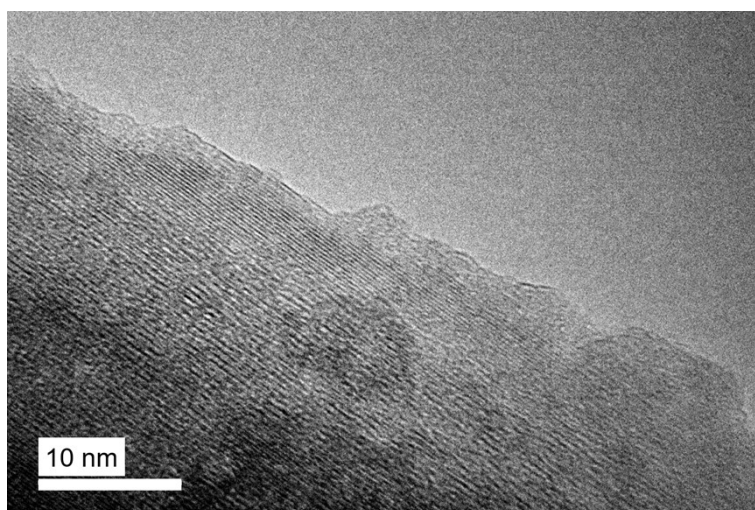

**Fig. S15** TEM images of NCM622 after cycling test in PISE.

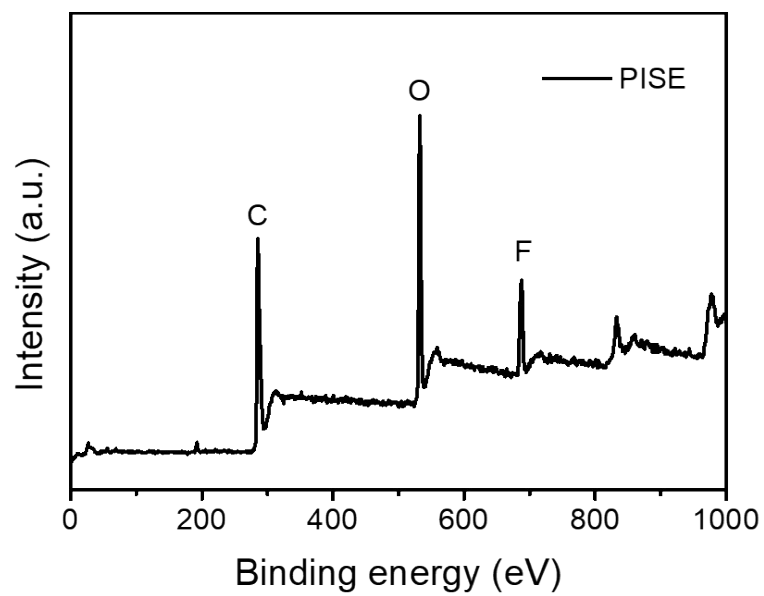

**Fig. S16** XPS spectra of lithium surface of the cycled NCM622/Li battery with *in-situ* PISE.

## Supplementary Tables

**Table S1** Composition of the different polymer electrolytes

|        | Concentration of<br>LiTFSI (mol L <sup>-1</sup> ) | Concentration of<br>LiDFOB (mol L <sup>-1</sup> ) | Mass ratio of<br>Sn (Oct) <sub>2</sub> |
|--------|---------------------------------------------------|---------------------------------------------------|----------------------------------------|
| PCL    | 0                                                 | 0                                                 | 10 wt%                                 |
| PCA    | 0                                                 | 0                                                 |                                        |
| PCL-PE | 1                                                 | 0.3                                               |                                        |
| PCA-PE | 1                                                 | 0.3                                               |                                        |
| PISE   | 3.0                                               | 0.3                                               |                                        |

**Table S2** The solubility of LiTFSI in the solution with different mass ratio of CL and LA.

| $\frac{m_{CL}}{m_{LA}}$ |                 | 10:0 | 9.5:0.5 | 9:1         | 8:2 | 7.5:2.5 |
|-------------------------|-----------------|------|---------|-------------|-----|---------|
| Lithim<br>concentration | 1 M<br>LiTFSI   | ☞    | ☞       | ☞           | ☞   | ☞       |
|                         | 2 M<br>LiTFSI   | ☞    | ☞       | ☞           | ☞   | ☞       |
|                         | 3 M<br>LiTFSI   | ☞    | ☞       | ☞<br>(PISE) | ☞   | ☞       |
|                         | 3.3 M<br>LiTFSI | ☞    | ☞       | ☞           | ☞   | ☞       |

**Table S3** Melting enthalpy, crystallinity and melting point of the different polymer electrolytes.

| Composition | $\Delta H_m$ (J/g) | Crystallinity (%) | $T_m$ (°C) | $T_g$ (°C)   |
|-------------|--------------------|-------------------|------------|--------------|
| PCA         | 33.4               | 24.9              | 45.8       | −60 (Ref. 1) |
| PCA-PE      | 4.53               | 3.4               | 40.6       | −62          |
| PISE        | Amorphous          |                   |            | −72.2        |

**Table S4** GPC test results of PEVC-PE with different concentration of lithium salt.

|        | $M_n$ | $M_w$ | PDI  |
|--------|-------|-------|------|
| PCA    | 45642 | 84591 | 1.85 |
| PCA-PE | 29223 | 58244 | 1.99 |
| PISE   | 10337 | 17022 | 1.64 |

**Table S5** The detailed information of the separator.

| Product type                   | SW507E            |           |
|--------------------------------|-------------------|-----------|
| Items                          | unit              | Test data |
| Thickness                      | $\mu\text{m}$     | 7.4       |
| Basis weight                   | $\text{g/m}^2$    | 4.1       |
| Permeability                   | s/100 mL          | 115       |
| Porosity                       | %                 | 42.3      |
| Puncture strength              | gf                | 376.9     |
| Tensile strength/MD            | $\text{Kgf/cm}^2$ | 2443      |
| Tensile strength/TD            |                   | 2575      |
| Heat shrinkage/MD (120 °C/1 h) | %                 | 5.0       |
| Heat shrinkage/TD (120 °C/1 h) | %                 | 4.9       |

## Reference

- [1] B. Zhang, Y. Liu, J. Liu, L. Liu, L. Sun, L. Cong, F. Fu, A. Mauger, C.M. Julien, H. Xie, X. Pan, “Polymer-in-ceramic” based poly( $\epsilon$ -caprolactone)/ceramic composite electrolyte for all-solid-state batteries, J. Energy Chem. 2021 , 52 , 318. <https://doi.org/10.1016/j.jechem.2020.04.025>.
